# Supplementary material
Source: publisher figshare collection journal article supplement (https://tandf.figshare.com/ndownloader/files/20157539)
Supplement: Supplementary file 1 [file 20157539]

**Supplementary material: Interview Schedule**

**Part A – narrative**

‘I am interested in learning about how you came to be homeless, your experience concerning brain injury and your experience using drugs and alcohol. Please begin where you would like to. I will listen first, I won’t interrupt you. I’ll take some notes in case I have any questions, so I can ask you when you’ve finished telling your story.’

**Part B – specific**

What was your childhood like growing up?

When did you first experience a head injury or can you recall when you first significantly hit your head? Can you please describe this?

What was it that made you seek medical attention?

Can you tell me how many head injuries you have received and the impact these have had on you? Please describe them and when they happened.

What was your life like prior to your head injury?

Can you describe any differences you noticed after your head injury?

Did you notice any cognitive impairment? Eg memory loss, speech

Did you notice anything different in the way you felt about your self?

Can you describe your diagnosis/medical experience?

Can you describe your experience of referral to other professionals and services?

Can you describe your experience concerning drugs and alcohol and when you first started using?

Why did you first start using drugs and why do you use them now?

Can you describe your experience of the care you have received from the services you have been involved with? Concerning substances, homelessness, head injury.

How do you feel about your role in making decisions about your health and situation?

Do you feel well-informed and included in the decision-making process in terms of treatment and interventions you have received or currently receiving?

Do you feel that your emotional, psychological needs have been met?

Do you feel your physical needs have been met?

Do you think that there are any other services or interventions you would like to receive?

**Part C- generic**

What was important to you before becoming homeless and what is important to you now?

What was important to you before using drugs and alcohol? and now?

What was important to you before sustaining your head injury? and now?

What do you think the future holds for you?
